# Supplementary material for: Sericin Ser3 Ectopic Expressed in Posterior Silk Gland Affects Hemolymph Immune Melanization Response via Reducing Melanin Synthesis in Silkworm
Source: MDPI journal article supplement (doi:10.3390/insects14030245), 2023-02-28
Supplement: s1 [file s1]

# Supplemental Materials

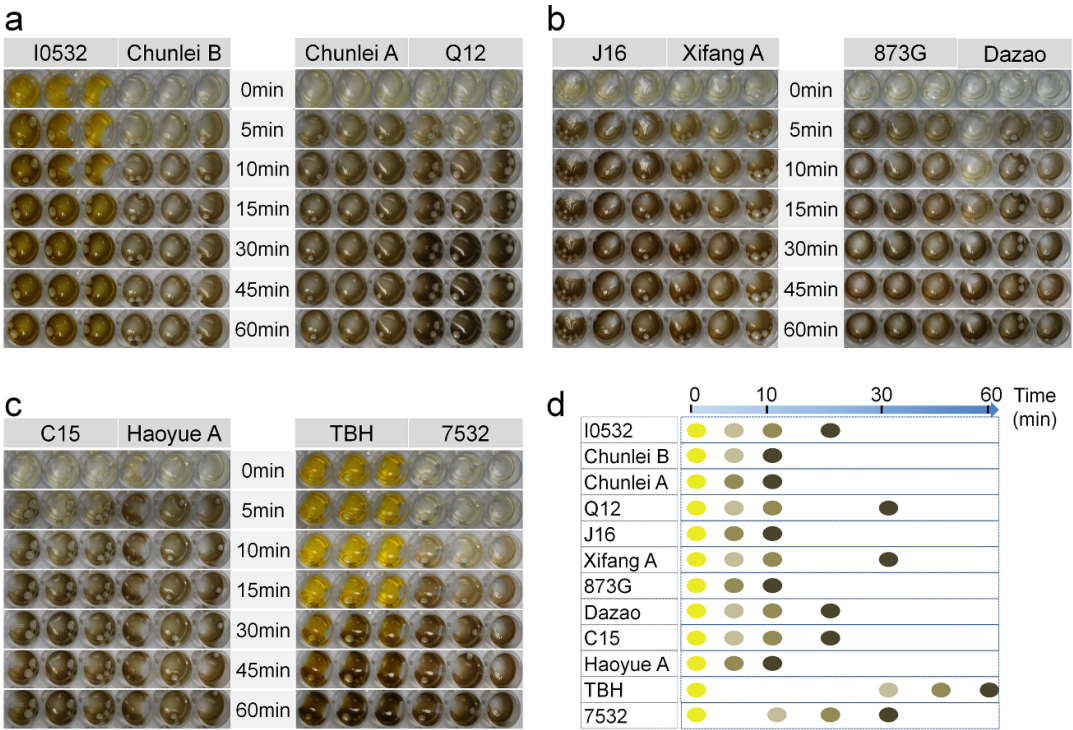

**Figure S1.** In vitro melanization of hemolymph of multiple silkworm varieties. **(a-c)** The melanization times of hemolymph from many varieties of silkworm. Silkworm varieties (strains) including I0532, Chunlei B, Chunlei A, Q12, J16, Xifang A, 873G, Dazao, C15, TBH and 7532. **(d)** Schematic diagram of hemolymph melanization times in vitro of multiple silkworm strains. According to the degree of melanization, there are four grades. The hemolymph just taken out is light yellow, and the beginning of oxidation and blackening is indicated by brown. The darker the color is, the deeper the degree of melanization is. Black means that the hemolymph is completely blackened.

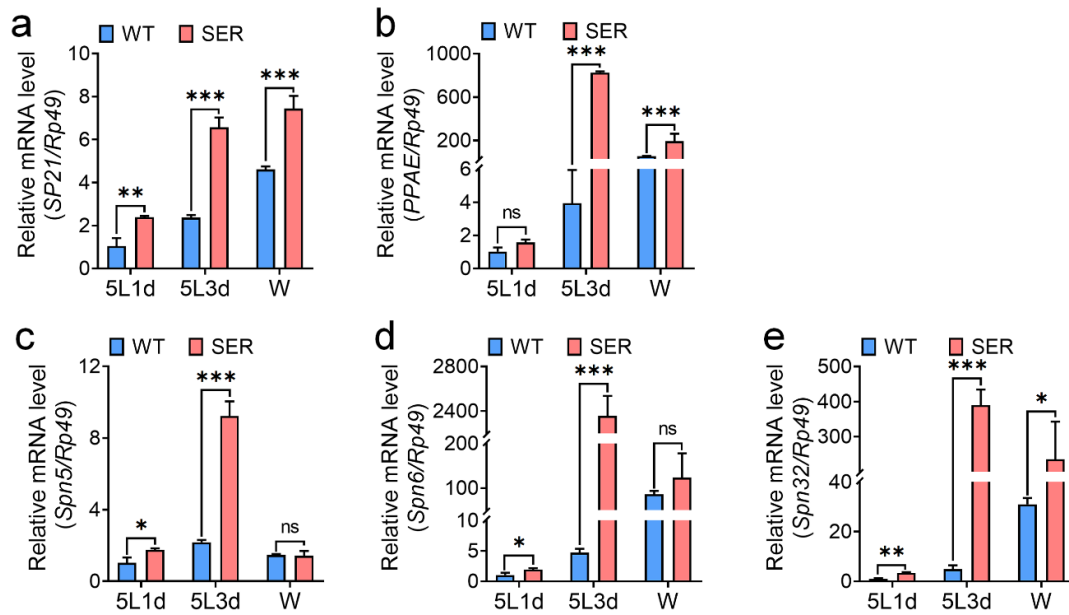

**Figure S2.** Changes in serine protease inhibitor gene transcription levels in fat body of transgenic silkworms. (a-e) qPCR was used to investigate the relative transcription level of genes. PPAE and SP21 are the positive regulatory genes that eventually activate PPO into PO; Spn5, Spn6 and Spn32 are the main member genes of the serine protease inhibitor family that are reversely regulated; and Rp49 was the internal reference gene. \* $p < 0.05$ ; \*\* $p < 0.01$ ; \*\*\* $p < 0.001$ ; ns, no significant difference between the two groups.  $n = 3$  biological repeats.

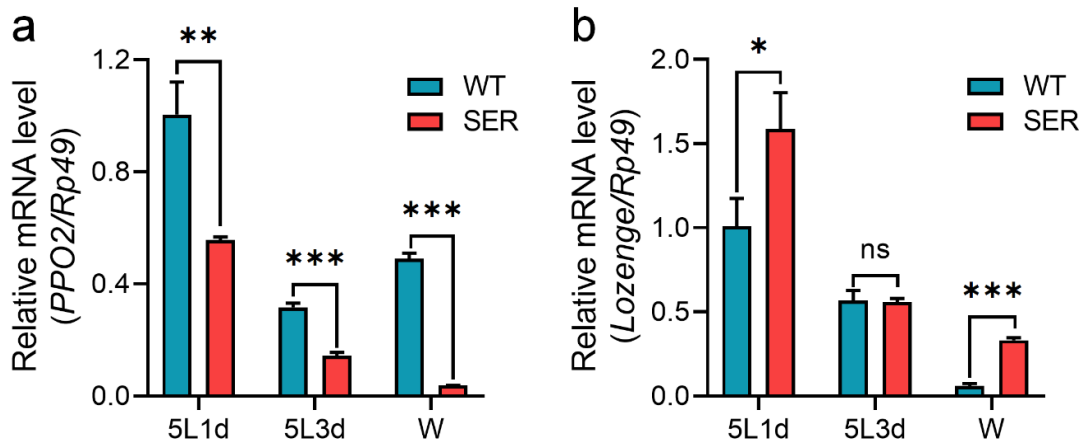

**Figure S3.** Changes in PPO2 and Lozenge gene transcription levels in hemolymph of transgenic silkworms. (a) PPO2, prophenoloxidase 2. (b) Lozenge. Rp49 was the internal reference gene. \* $p < 0.05$ ; \*\* $p < 0.01$ ; \*\*\* $p < 0.001$ ; ns, no significant difference between the two groups.  $n = 3$  biological repeats.

**Table S1. The primers used in the study**

| <b>Gene name</b> | <b>Forward (5'→3')</b> | <b>Reverse (5'→3')</b>  | <b>Gene ID</b> |
|------------------|------------------------|-------------------------|----------------|
| <i>CAT</i>       | aatgtcggcggagatgtagacc | gcagcagcatccttgaggatgat | 692456         |
| <i>DDC</i>       | ccaaccgctaactcgtat     | ataaccacttccaactctgt    | 692675         |
| <i>SP21</i>      | cctatgattaccagtccaaca  | ccttctcacacggatacac     | 100862834      |
| <i>PAH</i>       | cggctactgtcgtcctt      | ggctggtattctgtgatgg     | 101742825      |
| <i>PPAE</i>      | ggaggaatcttgatgtagg    | ctgatacggacacgcaat      | 692368         |
| <i>PPO1</i>      | gagaatatgtccgtgatgct   | ggttctctgctgatgatgg     | 692758         |
| <i>PPO2</i>      | gttactctgtggcactgat    | gtggaacatctggtggaat     | 693073         |
| <i>Spn32</i>     | cggaatgccaatcaagaag    | ggatcatcaagtctgaagtct   | 100272196      |
| <i>Spn5</i>      | agccagacttagccaact     | ccgattccgtgacctcta      | 692688         |
| <i>Spn6</i>      | ttctactaccgccttactct   | tctcaacgatgacttctctg    | 100126553      |
| <i>TH</i>        | ctgatataggcgtgacgat    | agaagattcactagcagcat    | 100270767      |
| <i>TPX</i>       | actacggagtgtgacg       | tcgggcttgatggtctt       | 733003         |
| <i>Cu/Zn-SOD</i> | tcgtggtgatgtagcggaact  | cgacatggcgtacagcagaact  | 692639         |
| <i>Mn-SOD</i>    | gattcgagttgccggtgcttct | gcttggtgcctgtgcgagttct  | 692736         |
| <i>Moricin</i>   | gcaatgtctctggtgtca     | gcgatattgatggctcttag    | 692365         |
| <i>CecropinA</i> | ccagggtggaaactcttcaa   | tttcgcttgccctatgac      | 693029         |
| <i>Lebocin</i>   | ggatatgttcgcagtgca     | ggtaagtccagtatcaact     | 100146108      |
| <i>Attacin</i>   | gtgtagegttgttgtgtt     | aggttccatccgagttca      | 692555         |
| <i>Lozenge</i>   | tcacaggagatagcataactc  | gggtccatcttgattgattgag  | 101747006      |
| <i>Rp49</i>      | cgttaaggctcctagttcaca  | cgtcactctgatgctgag      | 778453         |
